# Supplementary material for: Influence of Supplemental Feed Choice for Pasture-Based Cows on the Fatty Acid and Volatile Profile of Milk
Source: PubMed Central journal article supplement (PMC6518226; doi:10.3390/foods8040137), 2019-04-22

Supplementary Figure 1: Top 10 fatty acids significantly contributing to observed PCA separation

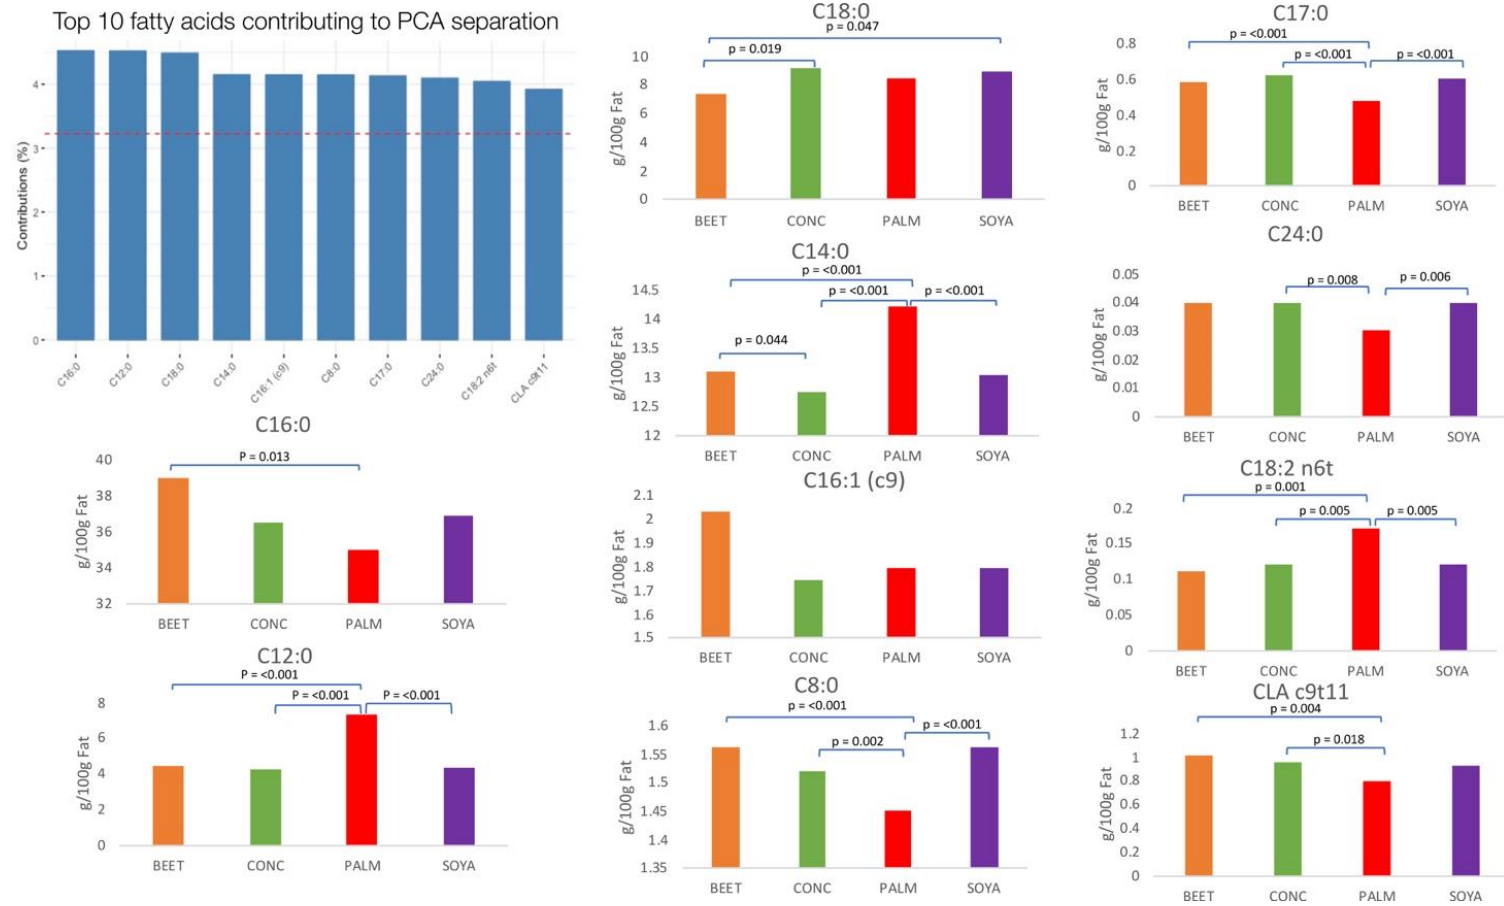

Supplement: foods-08-00137-s001.pdf [file foods-08-00137-s001.pdf]
